# Supplementary material for: Effects of dapagliflozin and dapagliflozin-saxagliptin on erythropoiesis, iron and inflammation markers in patients with type 2 diabetes and chronic kidney disease: data from the DELIGHT trial
Source: Springer Nature journal article supplement (doi:10.1186/s12933-023-02027-8), 2023-11-28
Supplement: MOESM1 [file 26368950]

**Additional file 1: Supplementary table S1.** Correlation coefficients between inflammation and iron markers and erythropoietin at baseline in overall population

|                | Urinary MCP-1/Cr        |         | Urinary IL-6/Cr         |         | Serum IL-6              |         |
|----------------|-------------------------|---------|-------------------------|---------|-------------------------|---------|
|                | Correlation coefficient | p value | Correlation coefficient | p value | Correlation coefficient | p value |
| Iron           | -0.12                   | 0.05    | -0.02                   | 0.73    | -0.18                   | <0.01   |
| Transferrin    | -0.16                   | 0.01    | -0.10                   | 0.11    | -0.07                   | 0.17    |
| TSAT           | -0.04                   | 0.51    | 0.04                    | 0.54    | -0.14                   | 0.008   |
| Ferritin       | 0.03                    | 0.61    | 0.06                    | 0.30    | -0.07                   | 0.20    |
| Erythropoietin | 0.05                    | 0.42    | -0.02                   | 0.76    | 0.05                    | 0.39    |

Correlation coefficients were shown as Pearson`s R.

Cr, creatinine; MCP-1, monocyte chemoattractant protein; IL-6, interleukin-6; TSAT, transferrin saturation
